# Supplementary material for: Evidence of effective scrapie transmission via colostrum and milk in sheep
Source: Springer Nature journal article supplement (doi:10.1186/1746-6148-9-99), 2013-05-07

**Study 1. Feeding milk from scrapie infected sheep to lambs with lambs housed together**

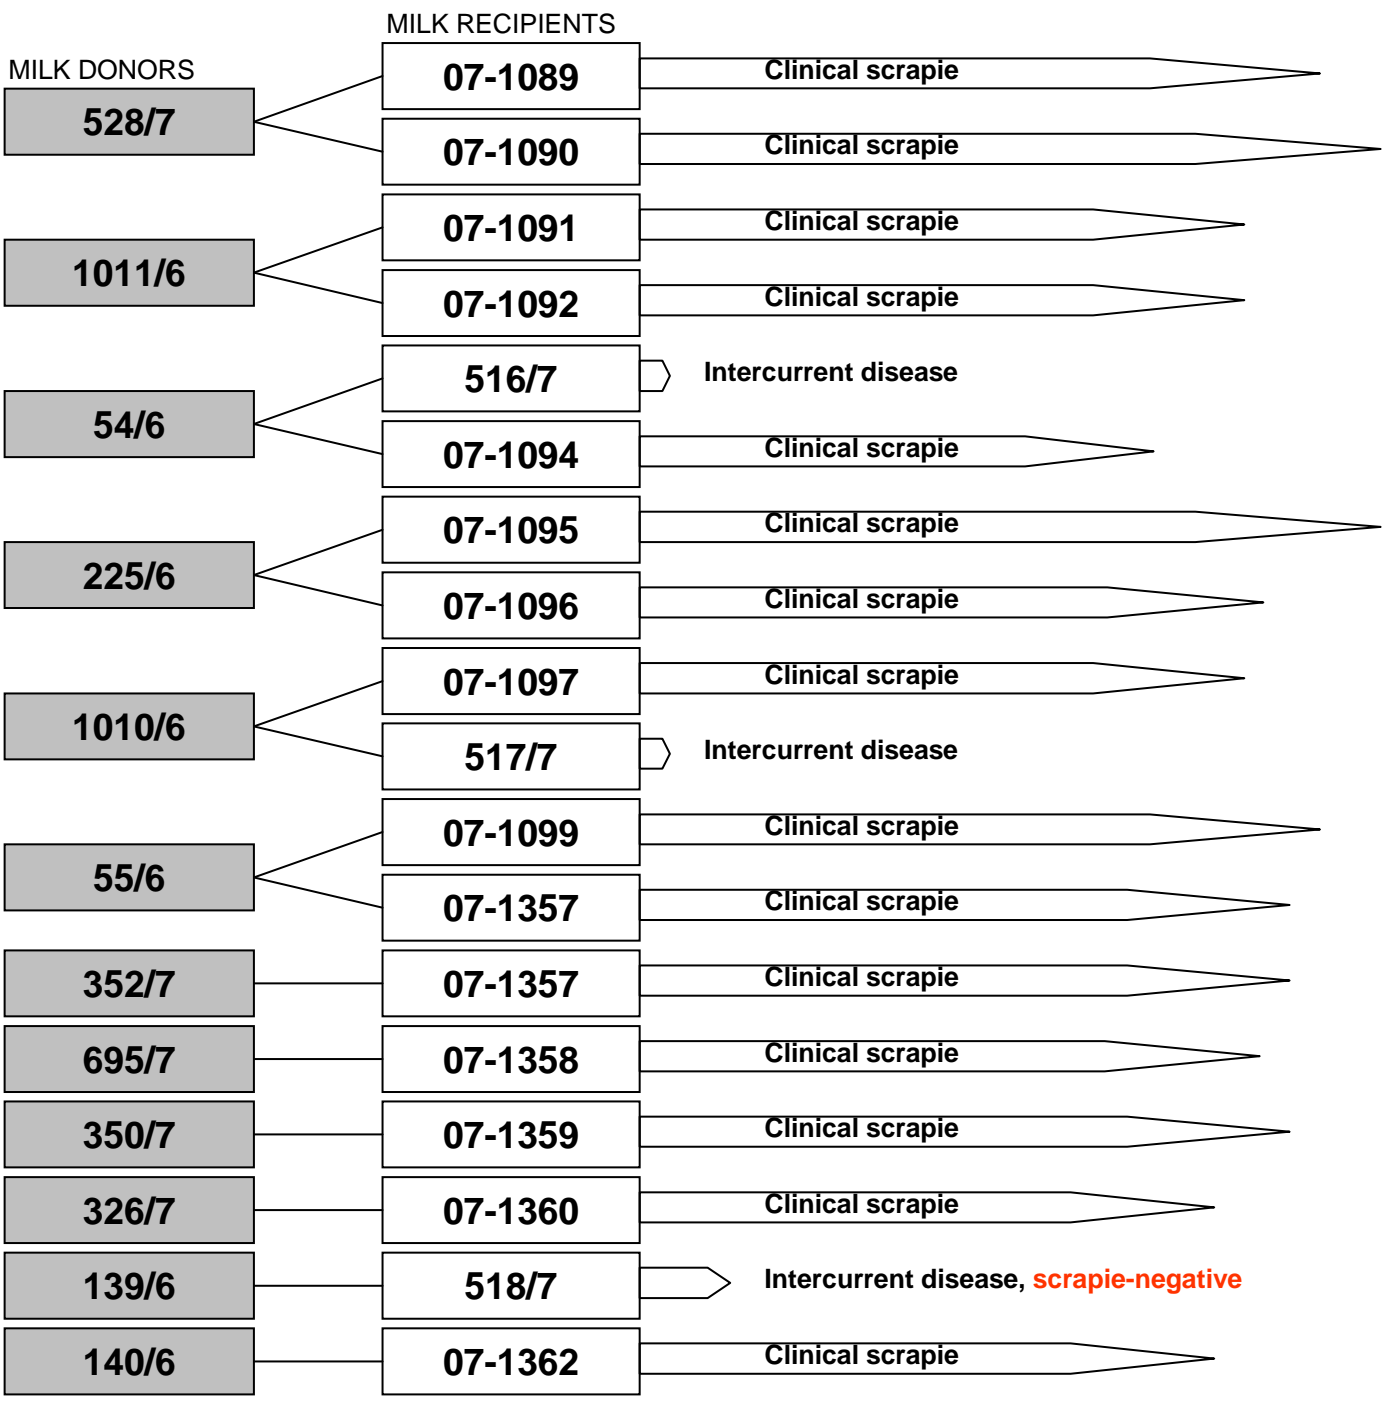

**07-1107, 07-1108, 07-1109, 07-1245, 07-1246**  
LATERAL TRANSMISSION CONTROLS

Clinical scrapie

**07-1363, 07-1264, 07-1265, 07-1366, 07-1367, 07-1368, 07-1369, 07-1370, 07-1371, 07-1372**  
BUILDING CONTROLS

End of study phase, **scrapie-negative**

# Study 2. Feeding milk from scrapie infected sheep to lambs without housing lambs together

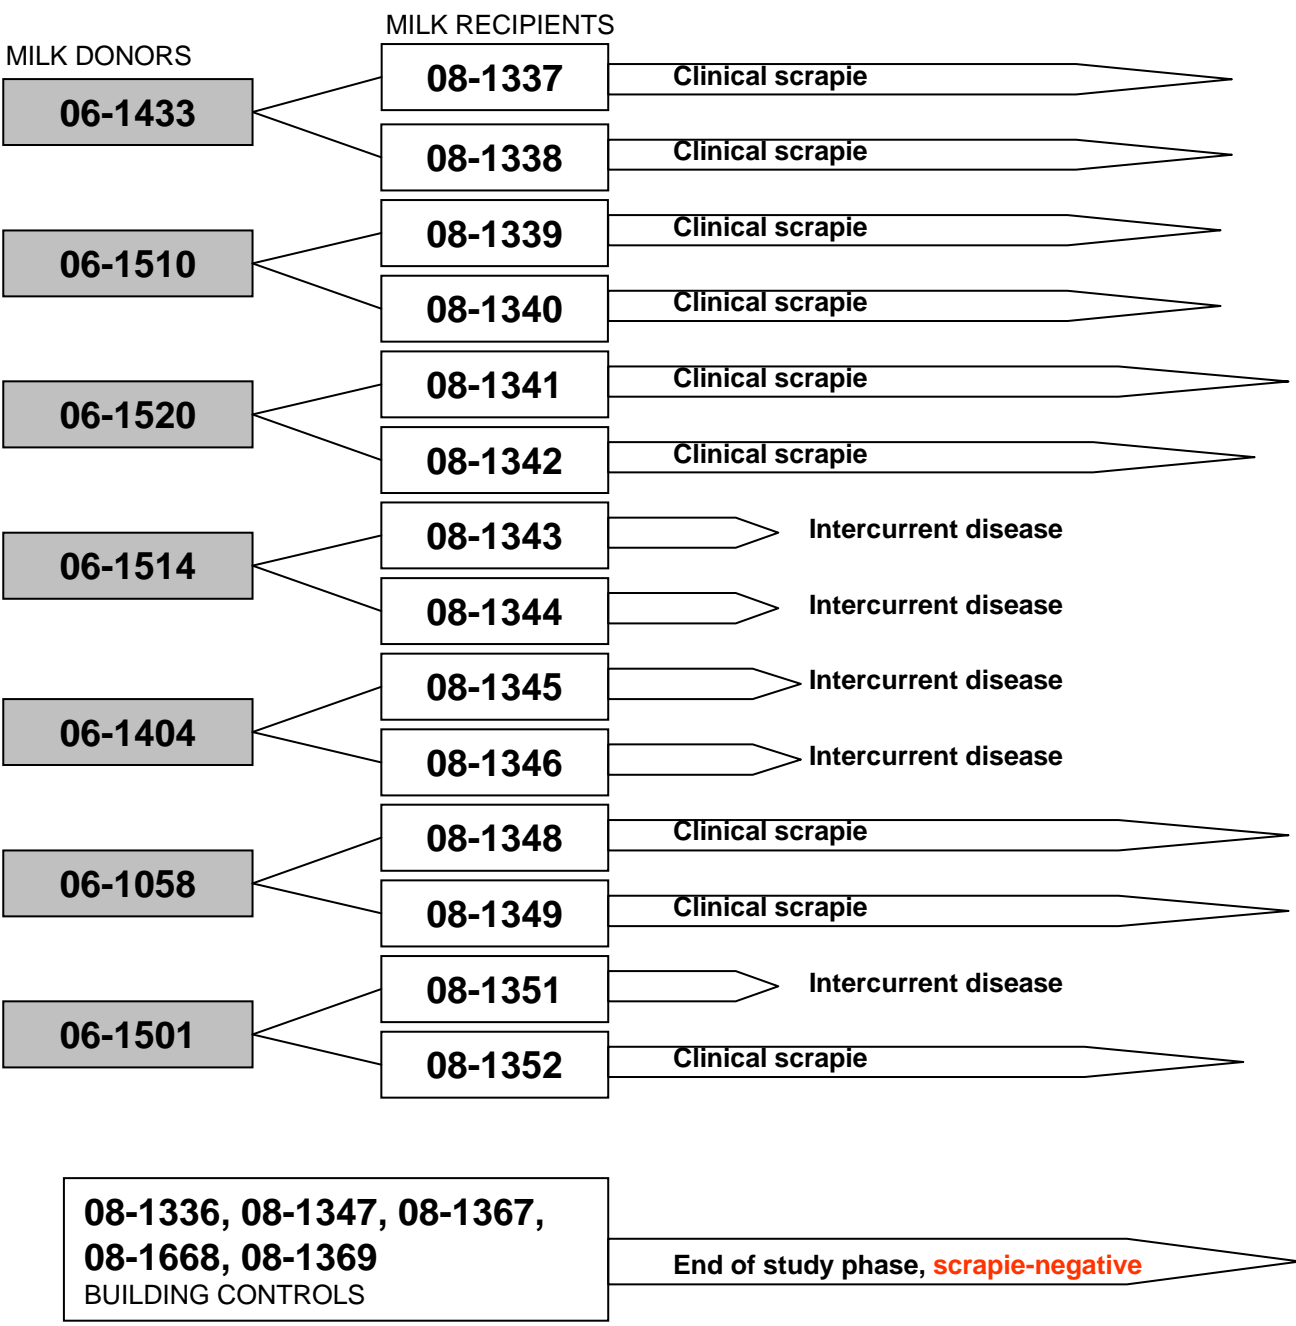

### Study 3. Feeding colostrum and milk from scrapie infected sheep to separate lambs

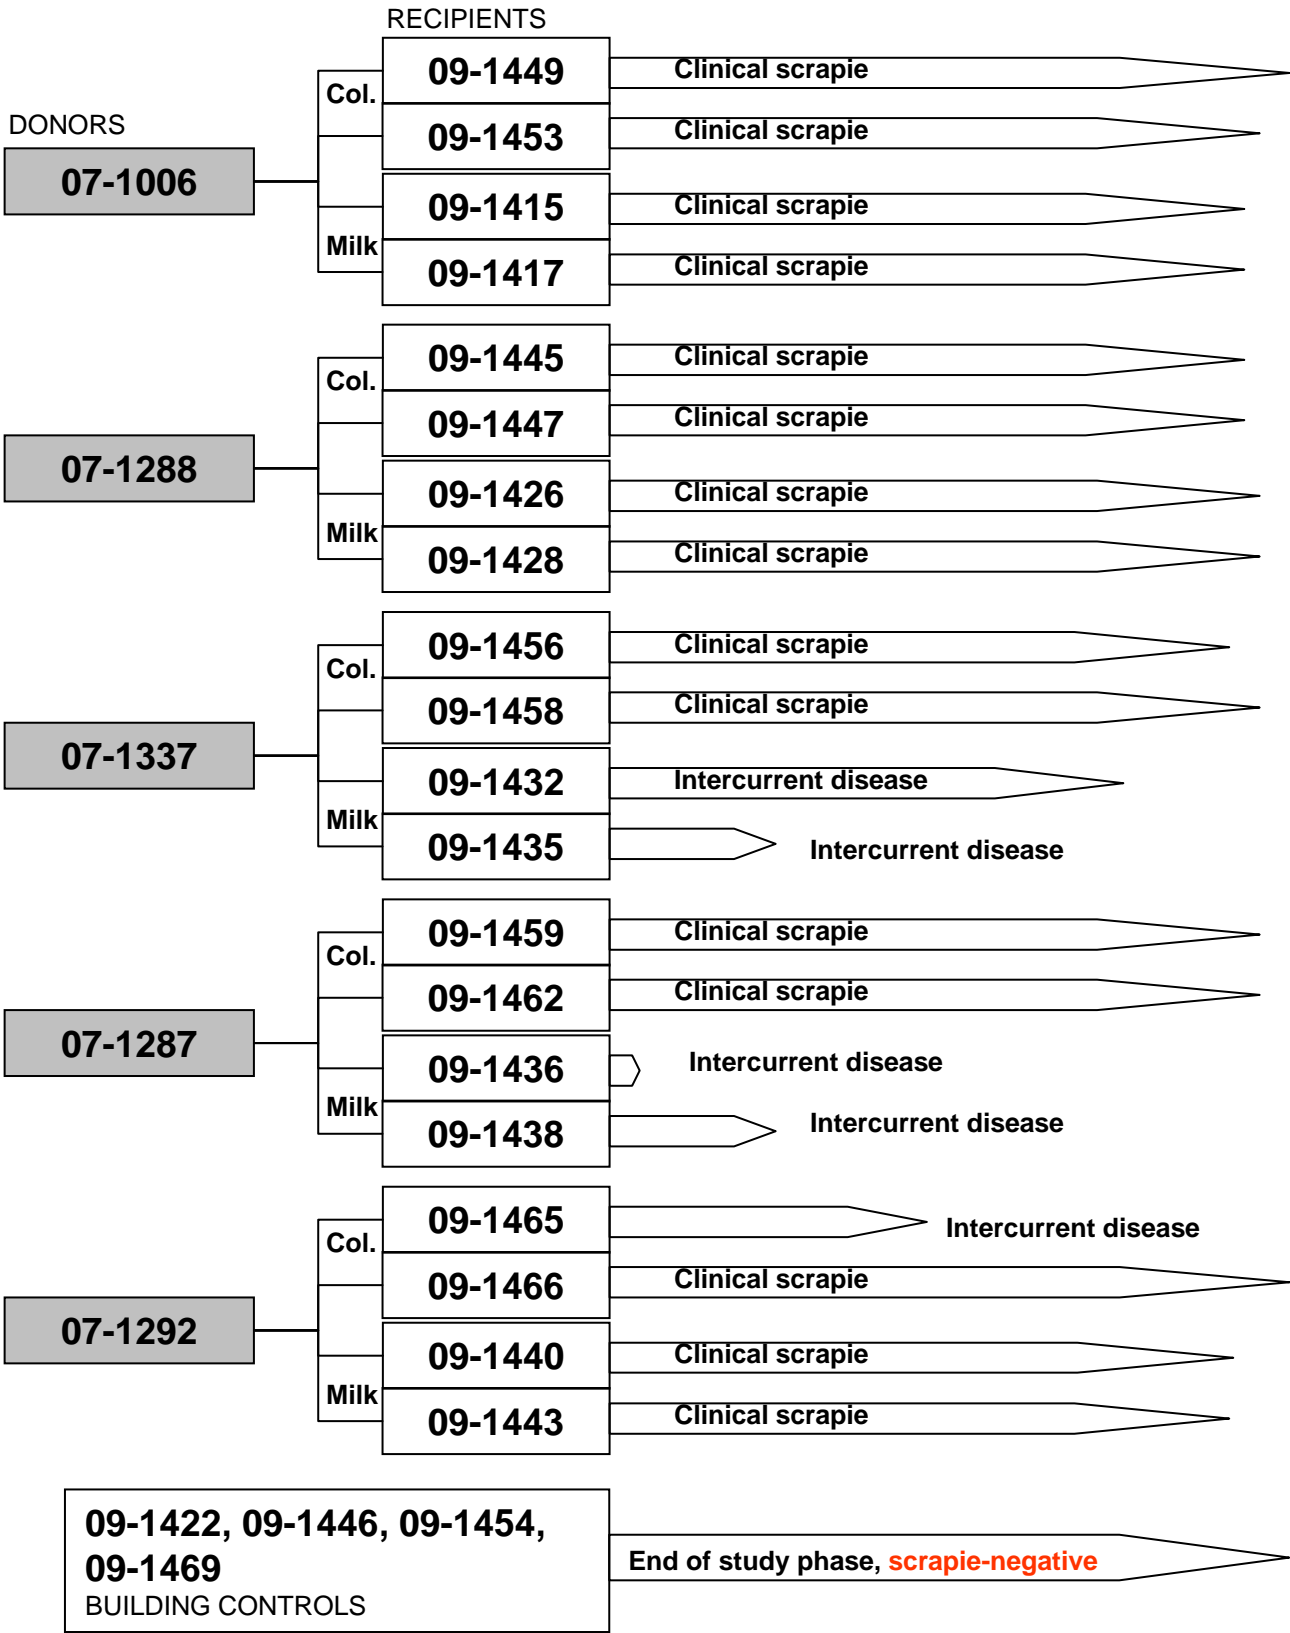

Supplement: 12917_2013_723_MOESM1_ESM.pdf [file 12917_2013_723_MOESM1_ESM.pdf]
